# Supplementary material
Source: MDPI journal article supplement (https://www.mdpi.com/2504-3900/100/1/1)
Supplement: s1 [file s1]

# Hidden Gems in the Genome: Pseudogenes Unleashing Revolution in Hepatocellular Carcinoma Detection and Therapy

**KRITIKA CHUGH, Graduate Student, School of Natural Sciences and Mathematics, The University of Texas at Dallas  
Richardson, Dallas, Texas - 75080, USA  
kritikachugh2@gmail.com**

## INTRODUCTION & AIM

Hepatocellular carcinoma (HCC) causes over 800,000 deaths yearly. Major risk factors are hepatitis B/C, alcohol, obesity, and diabetes. Most HCC arises after hepatitis virus-driven liver damage. Males predominately affected. Late diagnosis is common, severely limiting treatments.

Once dismissed as inconsequential, pseudogenes have emerged as key HCC regulators. Through multifaceted genetic and molecular mechanisms, they influence cancer signaling pathways. Some pseudogenes exhibit deep conservation and immense control of cancer-linked genes.

The review article highlight seminal discoveries of liver cancer pseudogene biomarkers for early detection, monitoring, and prognosis prediction. Targeting pseudogenes could profoundly impact HCC management. These overlooked genes may enable better diagnosis, outcomes forecasting, and therapeutic advancements against this deadly disease.

## PSEUDOGENES FROM JUNK DNA TO KEY PLAYERS

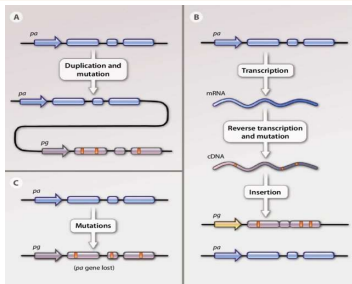

**Figure 1.** Types of pseudogenes: (A) Non-processed pseudogenes (B) Processed pseudogenes (C) Unitary pseudogenes.

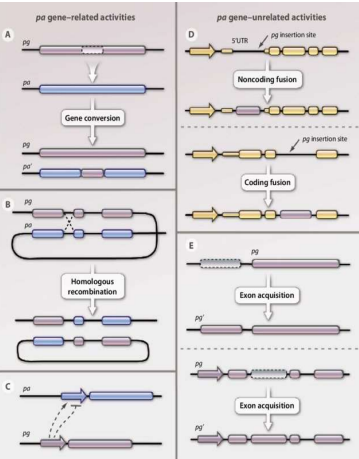

**Figure 2.** Mechanisms of action of pseudogenes at the DNA level. (A) Gene conversion (B) Homologous recombination (C) Regulatory sequences (D) Insertion of a processed pseudogene (E) Acquisition of new exons

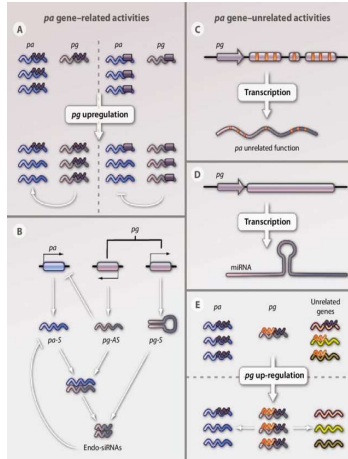

**Figure 3.** Mechanisms of action of pseudogenes at the RNA level. (A) Competition with parental gene mRNAs (B) Attraction of chromatin remodeling complexes (C) Acting as long non-coding RNAs (D) Serving as precursors for microRNAs (E) Competing for microRNA binding

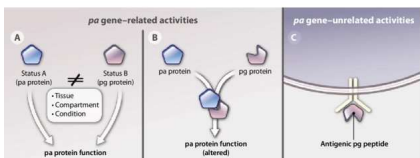

**Figure 4.** Mechanisms of action of pseudogenes at the protein level. (A) Pseudogenic proteins have the same activity as the parental proteins (B) Partially functional pseudogenic proteins or pseudogenic proteins with altered function (C) Short pseudogenic open reading frames

**References**  
1. Roberts LR et al. A global view of hepatocellular carcinoma: trends, risk, prevention and management. *Nat Rev Gastroenterol Hepatol* 16(10): 589-604, 2019.  
2. Pandey AK et al. Hepatocellular carcinoma: causes, mechanism of progression and biomarkers. *Curr Chem Genom Transl Med* 12: 9-26, 2018.

## PSEUDOGENES IN HCC PATHOGENESIS

| Pseudogenes | Implications in HCC                                                 |
|-------------|---------------------------------------------------------------------|
| ANXA2P2     | Modulates cell proliferation, motility, and cytoskeletal regulation |
| DUXAP10     | Involved in cell proliferation and cell-cycle modulation            |
| PDIA3P1     | Influences proliferation, migration, and invasiveness               |
| RACGAP1P    | Promotes cell growth and migration                                  |
| DUXAP8      | Impacts cell proliferation and cell-cycle regulation                |
| OCT4-pg4    | Enhances cell proliferation and colony formation                    |
| INTS6P1     | Affects cell growth, migration, and viability                       |
| AURKAPS1    | Involved in cell motility, migration, and invasion                  |
| PPIAP22     | Contributes to metastasis and immune cell infiltration              |
| E2F3P1      | Roles in cell proliferation, cell-cycle modulation                  |
| MSTO2P      | Multifaceted role in cell proliferation, apoptosis, and metastasis  |
| HSPB1P1     | Influences cell proliferation, apoptosis, and cell-cycle modulation |
| POU5F1B     | Linked to increased cell proliferation                              |
| UPAT        | Involved in migration, invasion, EMT, and CSC-like properties       |

## Pseudogene Expression Studies for HCC

**Table 1.** Pseudogenes expression levels in primary tissues, serum, and plasma for HCC diagnosis.

| PSEUDOGENES | REGULATION | SOURCE          | DIAGNOSTIC PROFICIENCY                                                                                                                                  |
|-------------|------------|-----------------|---------------------------------------------------------------------------------------------------------------------------------------------------------|
| ANXA2P2     | Up         | Tissue, Serum   | Differentiate HCC patients from healthy control                                                                                                         |
| DUXAP10     | Up         | Tissues         | Differentiate HCC patients from healthy control                                                                                                         |
| PDIA3P1     | Up         | Tissues         | Differentiate HCC patients from healthy control                                                                                                         |
| RACGAP1P    | Up         | Tissues         | Differentiate HCC and control                                                                                                                           |
| DUXAP8      | Up         | Tissues         | Differentiate HCC patients from healthy control                                                                                                         |
| OCT4-pg4    | Up         | Tissues         | Differentiate HCC patients from healthy control                                                                                                         |
| INTS6P1     | Down       | Tissues, Plasma | Differentiate HCC from healthy tissues in a primary tissue sample and plasma samples, Differentiate chronic HBV infection patients from normal controls |
| AURKAPS1    | Up         | Tissues         | Differentiate HCC and control                                                                                                                           |
| PPIAP22     | Up         | Tissues         | Differentiate HCC patients from healthy control                                                                                                         |
| MSTO2P      | Up         | Tissues         | Differentiate HCC patients from healthy control                                                                                                         |
| HSPB1P1     | Up         | Tissues         | Differentiate HCC patients from healthy control                                                                                                         |
| POU5F1B     | Up         | Tissues         | Differentiate HCC and healthy patients                                                                                                                  |
| UPAT        | Down       | Tissues         | Differentiate HBV-related HCC from healthy controls                                                                                                     |

**Table 2.** Pseudogenes as Prognostic Indicators in HCC.

| PSEUDOGENES        | REGULATION | SOURCE          | PROGNOSTIC BIOMARKERS                                                                     |
|--------------------|------------|-----------------|-------------------------------------------------------------------------------------------|
| ANXA2P2            | Up         | Tissue, Serum   | Poor prognosis and TNM stage                                                              |
| DUXAP10            | Up         | Tissues         | Reduced overall survival, higher pathologic stage, vascular invasion                      |
| PDIA3P1            | Up         | Tissues         | Worse overall survival, larger tumor size, metastasis, advanced TNM stage                 |
| RACGAP1P           | Up         | Tissues         | Shortened survival time, larger tumor size, elevated AFP levels, advanced clinical stage  |
| DUXAP8             | Up         | Tissues         | Diminished overall survival time, increased mutation burden, higher tumor grade and stage |
| OCT4-pg4           | Up         | Tissues         | Poor prognosis, associated with HCC stage                                                 |
| INTS6P1            | Up         | Tissues, Plasma | Indicates an alarming state                                                               |
| AURKAPS1           | Up         | Tissues         | Poor prognosis, linked to TNM stage, tumor size                                           |
| PPIAP22            | Up         | Tissues         | Reduced overall and disease-free survival, associated with clinical-stage and tumor size  |
| E2F3P1 (rs9909601) | Up         | Tissues         | Improved prognosis and extended survival                                                  |
| MSTO2P             | Up         | Tissues         | Lower survival rates and unfavorable prognosis                                            |
| HSPB1P1            | Up         | Tissues         | Adverse overall survival outcomes                                                         |
| POU5F1B            | Up         | Tissues         | Poor prognosis                                                                            |
| UPAT               | Down       | Tissues         | Decreased recurrence-free survival and unfavorable prognosis                              |

## CHALLENGES AND FUTURE DIRECTIONS

- ❖ Need to standardize Quantitative Real-Time PCR and other assays across labs and clinical settings for reliable results.
- ❖ Focusing on determining the most precise specimen type for pseudogene-based HCC biomarker data
- ❖ Addressing the high costs of whole-genome sequencing is essential to bring pseudogene diagnostics to routine clinical practice.
- ❖ Extensive studies involving diverse pseudogene panels and clinical stages of HCC are vital to validate pseudogenes role as clinical biomarkers.
